# Supplementary material for: Targeted release of live probiotics from alginate-based nanofibers in a simulated gastrointestinal tract
Source: Royal Society of Chemistry journal article supplement (doi:10.1039/d4lp00023d), 2024-01-01
Supplement: d4lp00023d1.pdf [file d4lp00023d1.pdf]

## Supplementary Information

### Targeted Release of Live Probiotics from Alginate-based Nanofibers in a Simulated Gastrointestinal Tract

Emily Diep and Jessica D. Schiffman\*

Department of Chemical Engineering, University of Massachusetts Amherst, Amherst, Massachusetts 01003-9303

\* Corresponding author: Email: schiffman@umass.edu

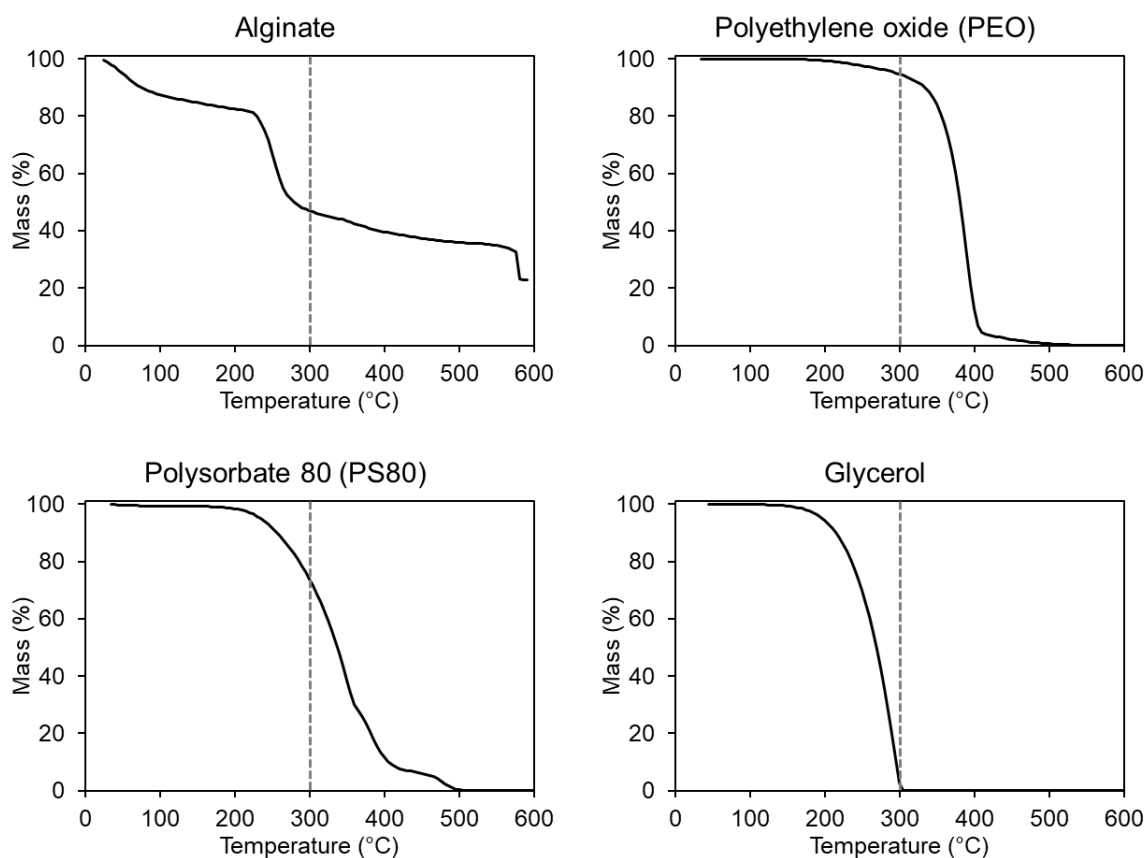

**Figure S1.** Thermogravimetric analysis was conducted on as-received samples of alginate, polyethylene oxide (PEO), polysorbate 80 (PS80), and glycerol. The temperature 300°C is shown by a dashed grey line for reference. Thermograms of alginate, PEO, and PS80 are replotted with permissions from ref 1. Copyright 2023 American Chemical Society.

**Table S1:** *L. lactis* loading in electrospun alginate-based nanofibers containing antacid and after crosslinking. All values are statistically equivalent.

| <b>Sample</b>  | <b>CaCO<sub>3</sub> concentration</b> | <b>Core/Shell flow rate (mL/hr)</b> | <b><i>L. lactis</i> loading (CFU/g)</b> |
|----------------|---------------------------------------|-------------------------------------|-----------------------------------------|
| <b>As-spun</b> | 2%                                    | 0.35/0.070                          | $1.35 \times 10^9$                      |
|                |                                       | 0.70/0.70                           | $1.03 \times 10^9$                      |
| <b>CLNF-G</b>  | 2%                                    | 0.35/0.070                          | $2.09 \times 10^8$                      |
|                |                                       | 0.70/0.70                           | $1.33 \times 10^8$                      |
| <b>CLNF-W</b>  | 2%                                    | 0.35/0.070                          | $3.79 \times 10^8$                      |
|                |                                       | 0.70/0.70                           | $3.48 \times 10^8$                      |

## REFERENCE

- (1) Diep, E.; Schiffman, J. D. Ethanol-Free Cross-Linking of Alginate Nanofibers Enables Controlled Release into a Simulated Gastrointestinal Tract Model. *Biomacromolecules* **2023**, *24* (6), 2908–2917. <https://doi.org/10.1021/acs.biomac.3c00274>.
